# Supplementary material for: Evaluating firefly extinction risk: Initial red list assessments for North America
Source: PubMed Central journal article supplement (PMC8598072; doi:10.1371/journal.pone.0259379), 2021-11-17

# PLOS ONE

## Evaluating firefly extinction risk: Initial Red List assessments for North America --Manuscript Draft--

|                                                                                                                                                                                                                                                                                                                                                                              |                                                                                                                                                                                                                                                                                                                                                                                                                                                                                                                                                                                                                                                                                                                                                                                                                                                                                                                                                                                                                                                                                                                                                                                                                                                                                                |
|------------------------------------------------------------------------------------------------------------------------------------------------------------------------------------------------------------------------------------------------------------------------------------------------------------------------------------------------------------------------------|------------------------------------------------------------------------------------------------------------------------------------------------------------------------------------------------------------------------------------------------------------------------------------------------------------------------------------------------------------------------------------------------------------------------------------------------------------------------------------------------------------------------------------------------------------------------------------------------------------------------------------------------------------------------------------------------------------------------------------------------------------------------------------------------------------------------------------------------------------------------------------------------------------------------------------------------------------------------------------------------------------------------------------------------------------------------------------------------------------------------------------------------------------------------------------------------------------------------------------------------------------------------------------------------|
| <b>Manuscript Number:</b>                                                                                                                                                                                                                                                                                                                                                    | PONE-D-21-17592                                                                                                                                                                                                                                                                                                                                                                                                                                                                                                                                                                                                                                                                                                                                                                                                                                                                                                                                                                                                                                                                                                                                                                                                                                                                                |
| <b>Article Type:</b>                                                                                                                                                                                                                                                                                                                                                         | Research Article                                                                                                                                                                                                                                                                                                                                                                                                                                                                                                                                                                                                                                                                                                                                                                                                                                                                                                                                                                                                                                                                                                                                                                                                                                                                               |
| <b>Full Title:</b>                                                                                                                                                                                                                                                                                                                                                           | Evaluating firefly extinction risk: Initial Red List assessments for North America                                                                                                                                                                                                                                                                                                                                                                                                                                                                                                                                                                                                                                                                                                                                                                                                                                                                                                                                                                                                                                                                                                                                                                                                             |
| <b>Short Title:</b>                                                                                                                                                                                                                                                                                                                                                          | Extinction risk for North American fireflies                                                                                                                                                                                                                                                                                                                                                                                                                                                                                                                                                                                                                                                                                                                                                                                                                                                                                                                                                                                                                                                                                                                                                                                                                                                   |
| <b>Corresponding Author:</b>                                                                                                                                                                                                                                                                                                                                                 | Candace E. Fallon<br>The Xerces Society for Invertebrate Conservation<br>Portland, OR UNITED STATES                                                                                                                                                                                                                                                                                                                                                                                                                                                                                                                                                                                                                                                                                                                                                                                                                                                                                                                                                                                                                                                                                                                                                                                            |
| <b>Keywords:</b>                                                                                                                                                                                                                                                                                                                                                             | Lampyridae; conservation status; extinction risk; IUCN Red List; firefly; invertebrate                                                                                                                                                                                                                                                                                                                                                                                                                                                                                                                                                                                                                                                                                                                                                                                                                                                                                                                                                                                                                                                                                                                                                                                                         |
| <b>Abstract:</b>                                                                                                                                                                                                                                                                                                                                                             | Fireflies are a family of charismatic beetles known for their bioluminescent signals. Recent anecdotal reports suggest that firefly populations in North America may be in decline. However, prior to this work, no studies have undertaken a systematic compilation of geographic distribution, habitat specificity, and threats facing North American fireflies. To better understand their extinction risks, we conducted baseline assessments according to the categories and criteria of the International Union for Conservation of Nature (IUCN) Red List for 132 species from the United States and Canada (approximately 79% of described species in the region). We found at least 18 species (14%) to be under threat of extinction from various threats, including habitat loss, light pollution, and climate change (sea level rise and drought). In addition, more than half of the species (53%) could not be assessed due to insufficient data, highlighting the need for further study. Future research and conservation efforts should prioritize monitoring and protecting populations of at-risk species, preserving and restoring habitat, gathering data on population trends, and filling critical information gaps for data deficient species suspected to be at risk. |
| <b>Order of Authors:</b>                                                                                                                                                                                                                                                                                                                                                     | Candace E. Fallon<br>Anna Walker<br>Sara Lewis<br>Joseph Cicero<br>Lynn Faust<br>Christopher M. Heckscher<br>Cisteil X. Pérez-Hernández<br>Ben Pfeiffer<br>Sarina Jepsen                                                                                                                                                                                                                                                                                                                                                                                                                                                                                                                                                                                                                                                                                                                                                                                                                                                                                                                                                                                                                                                                                                                       |
| <b>Additional Information:</b>                                                                                                                                                                                                                                                                                                                                               |                                                                                                                                                                                                                                                                                                                                                                                                                                                                                                                                                                                                                                                                                                                                                                                                                                                                                                                                                                                                                                                                                                                                                                                                                                                                                                |
| <b>Question</b>                                                                                                                                                                                                                                                                                                                                                              | <b>Response</b>                                                                                                                                                                                                                                                                                                                                                                                                                                                                                                                                                                                                                                                                                                                                                                                                                                                                                                                                                                                                                                                                                                                                                                                                                                                                                |
| <b>Financial Disclosure</b><br><br>Enter a financial disclosure statement that describes the sources of funding for the work included in this submission. Review the <a href="#">submission guidelines</a> for detailed requirements. View published research articles from <a href="#">PLOS ONE</a> for specific examples.<br><br>This statement is required for submission | CEF and SJ were funded by the Samuel Freeman Charitable Trust, the Edward Gorey Charitable Trust, the New-Land Foundation ( <a href="http://newlandfoundation.org/">http://newlandfoundation.org/</a> ), Morningstar Foundation ( <a href="http://themorningstarfoundation.com/">http://themorningstarfoundation.com/</a> ), and Xerces Society members. AW was funded by the New Mexico BioPark Society ( <a href="https://www.bioparksociety.org/main/">https://www.bioparksociety.org/main/</a> ). The funders had no role in study design, data collection and analysis, decision to publish, or preparation of the manuscript.                                                                                                                                                                                                                                                                                                                                                                                                                                                                                                                                                                                                                                                            |

and **will appear in the published article** if the submission is accepted. Please make sure it is accurate.

#### Unfunded studies

Enter: *The author(s) received no specific funding for this work.*

#### Funded studies

Enter a statement with the following details:

- Initials of the authors who received each award
- Grant numbers awarded to each author
- The full name of each funder
- URL of each funder website
- Did the sponsors or funders play any role in the study design, data collection and analysis, decision to publish, or preparation of the manuscript?
- **NO** - Include this sentence at the end of your statement: *The funders had no role in study design, data collection and analysis, decision to publish, or preparation of the manuscript.*
- **YES** - Specify the role(s) played.

\* typeset

#### Competing Interests

Use the instructions below to enter a competing interest statement for this submission. On behalf of all authors, disclose any [competing interests](#) that could be perceived to bias this work—acknowledging all financial support and any other relevant financial or non-financial competing interests.

This statement is **required** for submission and **will appear in the published article** if the submission is accepted. Please make sure it is accurate and that any funding sources listed in your Funding Information later in the submission form are also declared in your Financial Disclosure statement.

View published research articles from [PLOS ONE](#) for specific examples.

The authors have declared that no competing interests exist.

**NO authors have competing interests**

Enter: *The authors have declared that no competing interests exist.*

**Authors with competing interests**

Enter competing interest details beginning with this statement:

*I have read the journal's policy and the authors of this manuscript have the following competing interests: [insert competing interests here]*

\* typeset

**Ethics Statement**

N/A

Enter an ethics statement for this submission. This statement is required if the study involved:

- Human participants
- Human specimens or tissue
- Vertebrate animals or cephalopods
- Vertebrate embryos or tissues
- Field research

Write "N/A" if the submission does not require an ethics statement.

General guidance is provided below. Consult the [submission guidelines](#) for detailed instructions. **Make sure that all information entered here is included in the Methods section of the manuscript.**

**Format for specific study types**

**Human Subject Research (involving human participants and/or tissue)**

- Give the name of the institutional review board or ethics committee that approved the study
- Include the approval number and/or a statement indicating approval of this research
- Indicate the form of consent obtained (written/oral) or the reason that consent was not obtained (e.g. the data were analyzed anonymously)

**Animal Research (involving vertebrate animals, embryos or tissues)**

- Provide the name of the Institutional Animal Care and Use Committee (IACUC) or other relevant ethics board that reviewed the study protocol, and indicate whether they approved this research or granted a formal waiver of ethical approval
- Include an approval number if one was obtained
- If the study involved *non-human primates*, add *additional details* about animal welfare and steps taken to ameliorate suffering
- If anesthesia, euthanasia, or any kind of animal sacrifice is part of the study, include briefly which substances and/or methods were applied

**Field Research**

Include the following details if this study involves the collection of plant, animal, or other materials from a natural setting:

- Field permit number
- Name of the institution or relevant body that granted permission

**Data Availability**

Authors are required to make all data underlying the findings described fully available, without restriction, and from the time of publication. PLOS allows rare exceptions to address legal and ethical concerns. See the [PLOS Data Policy](#) and [FAQ](#) for detailed information.

Yes - all data are fully available without restriction

A Data Availability Statement describing where the data can be found is required at submission. Your answers to this question constitute the Data Availability Statement and **will be published in the article**, if accepted.

**Important:** Stating 'data available on request from the author' is not sufficient. If your data are only available upon request, select 'No' for the first question and explain your exceptional situation in the text box.

Do the authors confirm that all data underlying the findings described in their manuscript are fully available without restriction?

**Describe where the data may be found in full sentences. If you are copying our sample text, replace any instances of XXX with the appropriate details.**

- If the data are **held or will be held in a public repository**, include URLs, accession numbers or DOIs. If this information will only be available after acceptance, indicate this by ticking the box below. For example: *All XXX files are available from the XXX database (accession number(s) XXX, XXX).*
- If the data are all contained **within the manuscript and/or Supporting Information files**, enter the following: *All relevant data are within the manuscript and its Supporting Information files.*
- If neither of these applies but you are able to provide **details of access elsewhere**, with or without limitations, please do so. For example:

*Data cannot be shared publicly because of [XXX]. Data are available from the XXX Institutional Data Access / Ethics Committee (contact via XXX) for researchers who meet the criteria for access to confidential data.*

*The data underlying the results presented in the study are available from (include the name of the third party*

All relevant data are within the manuscript and its Supporting Information files

*and contact information or URL).*

- This text is appropriate if the data are owned by a third party and authors do not have permission to share the data.

\* typeset

Additional data availability information:

1 **Evaluating firefly extinction risk: Initial Red List assessments for North America**

2 Candace E. Fallon<sup>1,9\*</sup>, Anna Walker<sup>2,9</sup>, Sara Lewis<sup>3,9</sup>, Joseph Cicero<sup>4</sup>, Lynn Faust<sup>5,9</sup>, Christopher M.  
3 Heckscher<sup>6,9</sup>, Cisteil X. Pérez-Hernández<sup>7,9</sup>, Ben Pfeiffer<sup>8,9</sup>, and Sarina Jepsen<sup>1,9</sup>

4 <sup>1</sup>The Xerces Society for Invertebrate Conservation, Portland, Oregon, United States of America

5 <sup>2</sup>New Mexico BioPark Society, Albuquerque, New Mexico, United States of America

6 <sup>3</sup>Department of Biology, Tufts University, Medford, Massachusetts, United States of America

7 <sup>4</sup> School of Plant Sciences, University of Arizona, Tucson, AZ, United States of America

8 <sup>5</sup>Emory River Land Co., Knoxville, Tennessee, United States of America

9 <sup>6</sup>Department of Agriculture and Natural Resources, Delaware State University, Dover, Delaware, United  
10 States of America

11 <sup>7</sup>Instituto de Investigaciones en Ecosistemas y Sustentabilidad, Universidad Nacional Autónoma de  
12 México, Michoacán, México

13 <sup>8</sup>Firefly Conservation and Research, New Braunfels, Texas, United States of America

14 <sup>9</sup>IUCN SSC Firefly Specialist Group, Gland, Switzerland

15

16 \*Corresponding author

17 E-mail: [candace.fallon@xerces.org](mailto:candace.fallon@xerces.org)

## 18 **Abstract**

19 Fireflies are a family of charismatic beetles known for their bioluminescent signals. Recent  
20 anecdotal reports suggest that firefly populations in North America may be in decline. However, prior to  
21 this work, no studies have undertaken a systematic compilation of geographic distribution, habitat  
22 specificity, and threats facing North American fireflies. To better understand their extinction risks, we  
23 conducted baseline assessments according to the categories and criteria of the International Union for  
24 Conservation of Nature (IUCN) Red List for 132 species from the United States and Canada  
25 (approximately 79% of described species in the region). We found at least 18 species (14%) to be under  
26 threat of extinction from various threats, including habitat loss, light pollution, and climate change (sea  
27 level rise and drought). In addition, more than half of the species (53%) could not be assessed due to  
28 insufficient data, highlighting the need for further study. Future research and conservation efforts  
29 should prioritize monitoring and protecting populations of at-risk species, preserving and restoring  
30 habitat, gathering data on population trends, and filling critical information gaps for data deficient  
31 species suspected to be at risk.

## 32 **Introduction**

33 Effective conservation planning and action depends on identifying the most at-risk species based  
34 on their estimated probability of extinction. The International Union for Conservation of Nature (IUCN)  
35 Red List of Threatened Species is considered the global standard for estimating the risk of species  
36 extinction and can be used as a first step in conservation efforts [1,2]. First established in 1964, major  
37 gains have been made in adding new assessments to the Red List in recent years, moving ever closer to  
38 the group's goal of 160,000 assessed species. Currently, the Red List comprehensively covers charismatic  
39 vertebrates, including mammals (91% of all species assessed) and birds (100% of species assessed) [3].



40 Invertebrates, in contrast, are profoundly underrepresented on the Red List, with just 2% of described  
41 species (24,219 out of an estimated 1,478,938) assessed as of 2020 [3]. This gap is even wider for  
42 insects: although these represent an estimated 53% of described animal and plant species, only 1% of  
43 these have been assessed [3].

44 Beetles, a hyper-diverse group of insects with an estimated 386,500 described extant species  
45 worldwide [4] have been identified as a priority group for Red Listing due to their species richness,  
46 assessment practicality (e.g., relatively stable taxonomy, adequate information available), and economic  
47 value [5]. The firefly beetles (family Lampyridae), which contain some 2,200 species globally [4],  
48 represent an ideal group for Red List assessments because these charismatic and cosmopolitan insects  
49 have the potential to serve as flagship species for invertebrate conservation. They possess diverse life  
50 history traits and behaviors and have been the subject of active evolutionary, behavioral, and genetic  
51 research [6–10]. Firefly luciferase has facilitated numerous scientific advances in biomedicine [e.g., 11].  
52 Furthermore, fireflies are culturally, ecologically, and economically important, and because of their  
53 sensitivity to light pollution and other environmental degradation, they may be important bioindicators  
54 of ecosystem health [12–17]. Some species have been used as biological control agents of unwanted  
55 land snails [18].

56 Long-term surveys have revealed local population declines of the glow-worm *Lampyrus noctiluca*  
57 in the U.K. [19,20] and the congregating mangrove firefly *Pteroptyx tener* in Malaysia [21,22]. In North  
58 America, population declines have been anecdotally reported [16], but IUCN Red List assessments had  
59 yet to be conducted for any firefly species. A recent review of global threats to firefly persistence  
60 revealed that habitat degradation and loss, light pollution, pesticide use, poor water quality, climate  
61 change, and invasive species to be among the major suspected drivers of decline [23]. Firefly tourism,  
62 which has increased rapidly in recent years and has been identified as a potential threat, offers an

63 opportunity to examine how human activities can affect fireflies and their habitats, while determining  
64 how these activities can continue without causing local extirpations [17]. With emerging evidence for  
65 widespread declines in insect populations [24–26], there is an urgent need for formal assessments to  
66 inform the conservation status of firefly species and estimate their extinction risk.

67 This study summarizes global IUCN Red List assessments for fireflies in the U.S. and Canada,  
68 presenting the first formal estimates of extinction risk conducted for any member of this beetle family.  
69 We compiled available information on distributions, habitats, life history traits, behaviors, and threats  
70 for most (79%) of the currently described firefly species in the U.S. and Canada. Our goal in compiling  
71 this baseline data was to identify species at greatest risk of extinction, propose strategies for conserving  
72 threatened species, and highlight targets for future research.

## 73 **Methods**

### 74 **Study organism**

75 Fireflies (Coleoptera: Lampyridae) are holometabolous insects that spend the majority of their  
76 lives as larvae – sometimes up to 2 years or more – whereas adults may live only a few weeks [27].  
77 Generation time and seasonality vary considerably depending on latitude, elevation, degree day range,  
78 and sex and species-specific emergence timing, in addition to weather and climate [28]. In general,  
79 generation time increases with higher latitudes and elevations. Southern fireflies may have one-year life  
80 cycles, whereas northern populations could have two to three-year life cycles [28]. However, because  
81 fireflies are facultative in their development time, this period may increase in response to  
82 environmental variables such as drought [28] or increases in elevation (L. Buschman pers. comm. 2020).

83 Similarly, the breeding season may be longer (year-round for some species) at southern latitudes, while  
84 it will be much shorter at higher latitudes or elevations (lasting only a week to a few months) [28].

85 As larvae, fireflies are voracious predators of soft-bodied invertebrates including snails, slugs,  
86 and worms [9], but may also be scavengers of dead insects and berries [29]. They are typically  
87 subterranean or found on or near the soil surface, in leaf litter, or in rotting logs, depending on the  
88 genera and/or species [16,28,30]. Adults of most species are not known to feed, although some species  
89 have been observed nectaring on flowers, mouthing leaves, and feeding on sap [28,31–34], and the  
90 females of some *Photuris* species are predatory mimics of other fireflies [35,36].

91 Although fireflies are known for bioluminescence, the actual bioluminescent capabilities of the  
92 group as a whole are these: the larvae of all known firefly species are luminescent [9], and not all adults  
93 are capable of producing light. In the U.S. and Canada, fireflies can thus be organized into groups based  
94 on their bioluminescent capabilities: those that use flashing or glowing courtship signals (flashing  
95 fireflies and glow-worms), and those that do not (daytime dark species; in this context, ‘dark’ refers to  
96 non-luminescent or faintly luminescent diurnal species). Flashing fireflies, also known as lightningbugs,  
97 are typically crepuscular or nocturnally active; male and female adults use precisely timed flashes or  
98 flickers to communicate with potential mates [9]. Glow-worms are active during a similar time period  
99 but differ in that adult female glow-worms are typically flightless because their wings are short or even  
100 absent [9]. Furthermore, it is primarily the adult females that are luminescent, glowing to attract often  
101 non-luminescent males that fly overhead in search of a mate (there are some exceptions to this, e.g.  
102 *Phausis reticulata*) [9,37]. Daytime dark fireflies are diurnally active and are known [38] or suspected to  
103 use pheromones to locate potential mates [6,8].

104 Fireflies require moist conditions to prevent desiccation of larvae and their prey [9,16]. In  
105 general, fireflies are found in diverse habitats, including riparian woodlands, deserts, and coastal salt

106 marshes. While some species are strict habitat specialists, others utilize a variety of habitats. Certain  
107 species opportunistically occupy urban and rural areas such as residential lawns, crop fields, and  
108 overgrown lots.

## 109 **Species checklist**

110 We compiled a checklist of all native described species and subspecies of Lampyridae found in  
111 the U.S. and Canada based on Lloyd [39], which we updated to include recent species descriptions  
112 [30,40–42]. This yielded 167 species in 20 genera (S1 Table). Thirty-nine of these species were described  
113 in just the last 15 years [30,40–42], supporting speculation that as many as 225 species could occur in  
114 the U.S. and Canada [9]. One introduced European species, *Phosphaenus hemipterus*, reported from  
115 Nova Scotia [43], was not included. Synonymy was addressed using ITIS [44], Cicero [45], and other  
116 taxonomic references, where relevant. The updated checklist was reviewed by firefly experts (S2 Table).  
117 Thirty-five recently described *Photuris* species [30] were excluded due to a paucity of data and lack of  
118 knowledgeable taxonomic experts, yielding a total of 1  species that were assessed.

## 119 **Literature review and data compilation**

120 At the outset of the assessment process, we reviewed published literature and unpublished  
121 reports and solicited input from taxonomic experts. For 130 species and two subspecies, we compiled  
122 information on taxonomy, distribution, population size, ecology, behavior, threats, and any known  
123 conservation measures. Occurrence records were obtained from online biodiversity databases and  
124 museum collections (e.g., GBIF, SCAN, California Academy of Sciences), scientific literature, and species  
125 experts. Data were screened for anomalous records, which were vetted and removed if questionable.  
126 Unless pertaining to widespread or common species, observations from iNaturalist and BugGuide

127 community science sites were only used if they had been verified by a taxonomic expert  
128 (Role=Determiner, see S2 Table). In some cases, records from the published literature were  
129 georeferenced in order to draft more detailed distribution maps.

## 130 **IUCN Red List methodology**

131 We evaluated extinction risk for each species using the IUCN Red List Categories and Criteria:  
132 Version 3.1 [46]. Each species was assessed against five criteria with quantitative thresholds, which are  
133 based on standard biological indicators that render populations more vulnerable to extinction: A (past,  
134 present, or future population size reduction), B (geographical range size with evidence of decline,  
135 fragmentation, or fluctuation), C (small population size with decline, fragmentation, or fluctuation), D  
136 (very small or restricted population), and E (quantitative analysis of extinction risk).

137 Depending on which criteria thresholds were met, each taxon was assigned to one of the  
138 following IUCN Red List categories: Extinct (EX), Extinct in the Wild (EW), Critically Endangered (CR),  
139 Endangered (EN), Vulnerable (VU), Near Threatened (NT), Least Concern (LC) or Data Deficient (DD).  
140 Species assigned to the categories CR, EN, or VU are considered threatened because they are facing  
141 extremely high, very high, or high risk of extinction in the wild, respectively. Species assessed as Near  
142 Threatened are close to qualifying for a threatened category and therefore may qualify as threatened in  
143 the near future. Species assessed as Least Concern are generally widespread and abundant and do not  
144 qualify for a threatened category under any of the criteria. A taxon is considered Data Deficient when  
145 there is not enough information on the distribution or population size to make a direct or indirect  
146 assessment of its extinction risk. Species are assessed as Extinct when there is no reasonable doubt that  
147 the last individual has died, and species are assessed as Extinct in the Wild when they are known to  
148 survive only in captivity [47]. Like many invertebrates, none of the species assessed had sufficient

149 information on population size or rates of population size reduction to be evaluated against the  
150 thresholds for Criteria A, C, D and E. Therefore, all species assessed as threatened were done so under  
151 Criterion E, which is based on restricted ranges with evidence of decline, fragmentation, or fluctuation.  
152 Further details on the Red List methodology can be found in S1 Protocol.

## 153 **Synthesis and review**

154 Throughout the process, species experts (S2 Table) were consulted to verify that each species  
155 assessment and distribution map included accurate and up-to-date information. The majority of  
156 assessments (128 species) were published on the IUCN Red List in March 2021 [48], while the remaining  
157 four species are awaiting publication.

## 158 **Results and discussion**

### 159 **Species distributions**

160 Fireflies were recorded in every U.S. state except for Hawaii and every Canadian province and  
161 territory except Nunavut (Fig 1A; S1 Table). Thirty species (23%) were thought to be endemic to a single  
162 state or province (27% of which are categorized as threatened). States that support the highest numbers  
163 of endemic species include Arizona (eight species), Florida (eight species), California (five species), and  
164 Texas (four species) (S1 Table). In general, species richness increases moving from west to east; when  
165 we overlaid Level III Ecoregion [49] boundaries on the map, the major hotspots of species richness  
166 (defined here as areas with more than 30 species across most of the ecoregion) were in the North  
167 Central Appalachians, Northern Allegheny Plateau, Northern Piedmont, and Blue Ridge ecoregions (Fig  
168 1A). The Middle Atlantic Coastal Plain and Southeastern Plains also support more than 30 species each,

169 but only across a small part of the ecoregion. Threatened species are concentrated in the Mid-Atlantic  
170 and Southeast regions (Fig 1B), while DD species are scattered throughout the two countries (Fig 1C). All  
171 18 threatened species have narrow geographic ranges, with 10 thought to be endemic to a single state.  
172 It is likely that these distributions are heavily influenced by sampling bias and geographic concentrations  
173 of species experts; for example, West Virginia likely has higher species richness than is currently  
174 reported (12 species) given the high number of species found in surrounding states, but sampling efforts  
175 are not yet as comprehensive in this state.

176 **Fig 1. Species distributions and status summaries.** (A) Overall species richness of fireflies in the U.S. and  
177 Canada. Dark lines indicate Level III Ecoregion boundaries. (B) Geographic summary of threatened (CR,  
178 EN, or VU) firefly species. Note that the 2 species indicated in Arizona include 2 subspecies. (C)  
179 Geographic summary of data deficient firefly species (as a percent of the total number of species  
180 reported from each state).

## 181 **Extinction risk and threats**

182 Our assessments suggest that at least 14% of evaluated North American firefly species (18  
183 species) are threatened, classified as either Critically Endangered (C) Endangered (E) or Vulnerable  
184 (V) (Table 1). In addition,  were categorized as Near Threatened (NT) and 32% were classified as  
185 Least Concern (LC).  Over half (53%, ) of assessed firefly species were categorized as Data Deficient (DD),  
186 which means there remains considerable uncertainty in the proportion of North American fireflies that  
187 may be at risk of extinction. Our estimate of 14% threatened likely represents a lower limit, with an  
188 upper limit of 67% should all DD species turn out to be threatened. Following methods used in other  
189 Red List assessments [50,51], if we assume that our da efficient species follow a pattern similar to

190 those with sufficient data, we estimate that 29% (a “mid-estimate”) of North American firefly species  
 191 may eventually be classified as threatened.

192 **Table 1: Conservation status for 132 North American firefly species** 

| IUCN Red List Category                                            | Count | Percentage |
|-------------------------------------------------------------------|-------|------------|
| Extinct (EX)                                                      | 0     | 0%         |
| Extinct in the Wild (EW)                                          | 0     | 0%         |
| Critically Endangered (CR)                                        | 1     | 1%         |
| Endangered (EN)                                                   | 10    | 8%         |
| Vulnerable (VU)                                                   | 7     | 5%         |
| Near Threatened (NT)                                              | 2     | 2%         |
| Least Concern (LC)                                                | 42    | 32%        |
| Data Deficient (DD)                                               | 70    | 53%        |
| <b>Summary information</b>                                        |       |            |
| Total species evaluated                                           | 132   |            |
| Total species with sufficient data (CR+EN+VU+NT+LC)               | 62    | 47%        |
| Total Threatened - lower limit estimate (CR+EN+VU)                | 18    | 14%        |
| Total Threatened – mid estimate $((CR+EN+VU)/(total - DD)*total)$ | 38    | 29%        |



193

194 Invertebrate extinction risk has been linked to several different factors, including narrow  
 195 geographical ranges, habitat specialization, and body size [52–54]. For fireflies, Reed et al. [55] identified  
 196 risk factors expected to make species more susceptible to threats, including courtship activity period  
 197 (nocturnal vs. diurnal), poor dispersal ability (due in part to adult female brachyptery or aptery), and  
 198 habitat specialization. In our assessments, these risk factors were found to be prevalent among firefly  
 199 species with heightened extinction risk (Table 2).

200 **Table 2: Ecology and life history characteristics of 18 threatened firefly species in the U.S. and Canada.**

| Species name                                      | Common name                   | Category | Criteria                           |
|---------------------------------------------------|-------------------------------|----------|------------------------------------|
| <i>Bicellonycha wickershamorum</i>                | Southwest spring firefly      | VU       | B1ab(iii)                          |
| <i>Bicellonycha wickershamorum piceum</i>         | Gila Southwest spring firefly | EN       | B2ab(iii)                          |
| <i>Bicellonycha wickershamorum wickershamorum</i> | Southwest spring firefly      | VU       | B1ab(iii)                          |
| <i>Lucidota luteicollis</i>                       | Florida scrub dark firefly    | VU       | B1ab(iii)                          |
| <i>Micronaspis floridana</i>                      | Florida intertidal firefly    | EN       | B2ab(i,ii,iii)                     |
| <i>Photinus acuminatus</i>                        | Pointy-lobed firefly          | EN       | B2ab(i,ii,iii,iv,v)                |
| <i>Photinus knulli</i>                            | Southwest synchronous firefly | VU       | B1ab(iii)                          |
| <i>Photuris bethaniensis</i>                      | Bethany Beach firefly         | CR       | B1ab(i,ii,iii,v)                   |
| <i>Photuris cinctipennis</i>                      | Belted firefly                | EN       | B1ab(ii,iii)+2ab(ii,iii)           |
| <i>Photuris flavicollis</i>                       | Sky island firefly            | VU       | B1ab(iii)                          |
| <i>Photuris forresti</i>                          | Loopy five firefly            | EN       | B1ab(i,ii,iii,iv)+2ab(i,ii,iii,iv) |
| <i>Photuris mysticalampas</i>                     | Mysterious lantern firefly    | EN       | B1B2ab(ii,iii)                     |
| <i>Photuris pensylvanica</i>                      | Dot-dash firefly              | VU       | B2ab(iii)                          |
| <i>Photuris pyralomima</i>                        | None                          | EN       | B1ab(i,ii,iii)+B2ab(i,ii,iii)      |
| <i>Photuris walldoxeyi</i>                        | Cypress firefly               | VU       | B2ab(iii)                          |
| <i>Pleotomodes needhami</i>                       | Ant-loving scrub firefly      | EN       | B1ab(iii)                          |
| <i>Pyractomena ecostata</i>                       | Keel-necked firefly           | EN       | B2ab(i,ii,iii)                     |

201 For species with sufficient information to identify known and suspected threats to their  
202 persistence (88 species total), the primary threats included habitat loss and degradation, light pollution,  
203 and climate change and severe weather. Habitat loss has been identified as the biggest perceived threat  
204 to fireflies worldwide [23], rendering habitat specialists particularly vulnerable. All 18 species  
205 categorized as threatened are known or suspected to be restricted to specialized habitats like  
206 freshwater interdunal swales or cypress swamps (Fig 2), which makes them more vulnerable to habitat  
207 loss, degradation, and fragmentation. These threats are caused by a variety of human activities,  
208 including commercial and residential development, agricultural conversion, water pollution,  
209 groundwater pumping, waterway modifications, cattle grazing, and recreational activities such as off-  
210 road vehicle (ORV) use. Habitat loss and degradation can be particularly devastating for species with  
211 flightless females, which are more vulnerable to trampling or habitat destruction due to their limited  
212 dispersal capacity. Two of the species categorized as threatened, the Florida scrub dark firefly (*Lucidota*  
213 *luteicollis*) and the ant-loving scrub firefly (*Pleotomodes needhami*), have flightless adult females.  
214 Considering that approximately a quarter of firefly species in the U.S. and Canada have or are expected  
215 to have flightless females, 23 species (68%) of which were categorized as DD, it is likely that additional  
216 species will eventually be categorized as threatened.

217 **Fig 2. Threatened fireflies tend to be restricted to specialized habitats.** From top: *Lucidota luteicollis*  
218 and upland sand scrub, FL (L: Brandon Woo, R: Leo Miranda/USFWS); *Micronaspis floridana* and coastal  
219 salt marsh, FL (L: Drew Fulton, R: Rain0975); *Photuris bethaniensis* and interdunal swale, DE (L:  
220 Christopher M. Heckscher, R: Emily May); *Photuris walldoxeyi* and cypress swamp, MS (L: Luiz Silveira, R:  
221 Visit Mississippi); *Pyrractomena ecostata* and Atlantic tidal marsh, DE (L: Oliver Keller, R: Andy Atzert);  
222 *Pyrractomena vexillaria* and habitat along the Devils River, TX (L: Mike Quinn, R: Ben Pfeiffer).

223 In general, moisture is critically important during all firefly life stages to prevent desiccation [9];  
224 eggs, soft-bodied larvae, and flightless females may be particularly susceptible [56]. Thus, loss of  
225 moisture due to habitat manipulation, drought, or mismanagement of water resources can negatively  
226 impact fireflies. Because firefly larvae are predatory on soft-bodied invertebrates that are also  
227 susceptible to desiccation, loss of moisture can impact prey populations as well. Climate change is likely  
228 to be a major concern for many species. In the arid American West, droughts are becoming more  
229 widespread, frequent, and severe due to a changing climate [57]. As a result of this, combined with  
230 changing precipitation patterns and increasing human demands, water tables are dropping [58,59],  
231 which can cause ephemeral aquatic habitats to go dry, interrupt flow regimes, and stress local plant  
232 communities [60]. For example, some western firefly habitats have completely disappeared due to  
233 water table reductions [61], and continuing declines in plant communities along riparian corridors in  
234 Texas are causing reduced moisture retention in the soil, which contributes to lower quality habitat for  
235 firefly larvae and diminishes the amount of water available to recharge aquifers (B. Pfeiffer pers. obs.).

236 Wetland habitats overall are in decline across the U.S., primarily from development; over a 200-  
237 year period from the 1780s to 1980s, the contiguous U.S. lost an estimated 53% of original wetlands  
238 [62]. More recently, although the pace of loss appears to have slowed [63], wetland loss continues to  
239 occur at a high rate in certain regions. For example, the northeast and southeast regions of the U.S.,  
240 where firefly species richness is highest (Fig 1A), both saw downward trends in wetlands acreage from  
241 1992 to 2010 [64]. Coastal regions are particularly at risk; an estimated 80,000 acres of coastal wetlands  
242 in the contiguous U.S. are lost each year due to development, drainage, storms, and sea level rise [63].  
243 Loss of wetland habitat due to sea level rise was identified as a major threat to coastal firefly species like  
244 *Photuris bethaniensis* and *Micronaspis floridana*. Because these are habitat specialists and occupy small  
245 areas threatened by intense coastal development, their capacity to disperse to other sites is limited [65].

246           Development is also linked to light pollution, or artificial light at night (ALAN), a threat affecting  
247 17 out of 18 threatened firefly species. ALAN is comprised of skyglow (the diffuse glowing haze over  
248 populated areas), glare (excessive amounts of lighting), and light trespass (light that spills out beyond its  
249 intended target). It can be caused by a number of different sources, from commercial and residential  
250 development to vehicle headlights and gas flares. All sources of ALAN have the potential to drive firefly  
251 population declines. More than 75% of firefly species in the United States and Canada are nocturnally  
252 active or crepuscular species that utilize bioluminescent courtship signals that are sensitive to  
253 environmental light conditions. A growing body of research suggests that artificial light from street  
254 lamps, residences, and other sources may overwhelm the optical systems of fireflies and impede the  
255 ability of males to locate female mates [23,66]. For example, experimental studies have shown that  
256 artificial light can interfere with the production and reception of courtship signals [67,68] and inhibit  
257 larval dispersal [69], which could affect reproductive fitness and have cascading impacts for firefly  
258 populations.

## 259 **Moving forward: Conservation actions**

260           The results of our assessments have made it clear that additional conservation actions are  
261 needed for fireflies in the U.S. and Canada (S3 Table). More specifically, this includes identifying and  
262 protecting populations of at-risk species, preserving and restoring firefly habitat, gathering data on  
263 population trends, and filling critical information gaps for data deficient species suspected to be at risk.  
264 Science communication is also important: conducting education and outreach can help ensure that  
265 fireflies and their needs are taken into consideration. In the following sections, we expand on these  
266 recommended next steps to prevent firefly species extinctions.

## 267 **Protect at-risk species**

268           These assessments identified 18 species at risk of extinction and two others that may be at risk  
269 in the near future (Near Threatened). Currently, very few conservation measures are ~~currently~~ in place  
270 to protect North American fireflies. Species-specific conservation actions should focus on prioritizing  
271 these threatened species. The Critically Endangered Bethany Beach firefly, *Photuris bethaniensis*, which  
272 is listed as State Endangered in Delaware, is currently under consideration for Endangered Species Act  
273 (ESA) listing—the first firefly to be petitioned [70]. No other fireflies are included in endangered species  
274 lists for any state or province, and no regulatory mechanisms are in place to protect at-risk species.  
275 However, several states, including Delaware, Florida, Indiana, Maryland, and South Carolina, do include  
276 at-risk firefly species as Species of Greatest Conservation Need (SGCN) in their State Wildlife Action  
277 Plans. These plans are intended to inform conservation priorities and actions at the state level, with a  
278 particular focus on strategies for managing and protecting SGCN. We recommend that state wildlife  
279 agencies include threatened firefly species as SGCN, if they are not already included. Furthermore, we  
280 suggest that  species that we suspect to be threatened also be considered as SGCN (S5 Table). In  
281 addition to these efforts, we support converting the Red List assessments so that each species can be  
282 assessed using the Nature  ve ranking calculator and made available to the NatureServe Network. This  
283 will further enable states to assign state ranks that could streamline conservation and funding efforts for  
284 species found within their borders.

## 285 **Preserve and restore habitat**

286           Because habitat loss is a key threat to fireflies, preserving and restoring habitat for threatened firefly  
287 species will be an integral part of any conservation efforts. This can be accomplished in several ways:

- 288 • Protect and restore occupied and adjacent habitat to support threatened species, such as  
289 coastal salt marshes and cypress swamps (see Table 2)
- 290 • Work with local conservation organizations and land trusts to establish Firefly Sanctuaries in  
291 areas with threatened or endemic species or high species diversity
- 292 • Work with tourism sites to establish and implement clear guidelines for managers, tour  
293 operators, and visitors to ensure that fireflies are protected from tourism-related threats  
294 [e.g., 17]
- 295 • Mitigate light pollution close to firefly habitat through educational outreach programs, Dark  
296 Sky Initiatives, and updates to city lighting ordinances
- 297 • Refrain from using pesticides, particularly insecticides and molluscicides, in areas used by  
298 fireflies, as these can kill fireflies and their prey, and may have other unintended  
299 consequences

## 300 **Survey and monitor populations**

301 Surveys and monitoring were identified as key conservation actions for all 18 threatened species  
302 and all of the  species. A shortage of survey efforts and population monitoring for the majority of  
303 species--due in no small part to a lack of standardized methodology for tracking them, short species  
304 activity windows, difficulty in reaching survey sites, difficulty in identification at the species level, the  
305 hazards posed by nocturnal fieldwork, and a general lack of funding--severely limits our ability to track  
306 firefly populations over time. Baseline inventories to determine species distributions are needed to  
307 better understand the conservation status and needs of individual species. In particular, randomized  
308 grid surveys over large geographic areas, coupled with targeted surveys for known threatened species,  
309 could help reduce survey bias and increase the scope of survey effort 

310 While such surveys at the local, state, and federal levels are recommended, successful survey  
311 programs may rest on integrating these efforts with large-scale initiatives across wide geographic areas.  
312 Community (“citizen”) science projects have a long and illustrious history of engaging public interest  
313 while benefiting conservation efforts, and many have effectively incorporated web-based tools [e.g., 71]  
314 to increase participation and dissemination of data. For many insects, incorporating species-level  
315 identifications in such projects can be challenging due to insects’ hyper diversity, small size, often  
316 abstruse taxonomy, and difficulty of field identification. In the face of recent insect declines, however,  
317 community science has the potential to fulfill a critical need in documenting species distributions and  
318 population trends [26,72,73]. For fireflies in particular, Firefly Watch [74] has engaged thousands of  
319 community scientists across North America since it started in 2008, and additional resources are now  
320 available to aid field-based species identifications [28]. Regional projects such as the Western Firefly  
321 Project [75] are also filling data gaps. To gather additional occurrence data for species not typically  
322 covered by these programs, volunteers who are trained to identify their local threatened and d   
323 deficient species could contribute high-quality, geotagged photographs and details of flash pattern  
324 behavior, when applicable, to iNaturalist [76].

325 Given the apparent rarity or limited abundance of some firefly populations, large-scale collecting  
326 should be avoided. Lethal sampling is generally not recommended other than for the purposes of  
327 collecting voucher specimens to verify species occurrence. When possible, geotagged voucher photos  
328 with corresponding habitat and behavior information should be used in lieu of physical vouchers.

## 329 **Fill data gaps**

330 More than half (53%) of the species assessed were Data Deficient, indicating that more  
331 information is needed to assess these species’ extinction risks. Data  deficient species tended to be

332 characterized by cryptic life histories, non-flashing communication behavior, or flightless adult females.  
333 For example, a large portion of glow-worm species (79%) and diurnal fireflies (68%) are categorized as  
334 Data Deficient, as opposed to 38% of flashing species (S4 Table). The comparatively high rate of data  
335 deficiency in glow-worm species is likely due in part to the difficulty in detecting these less conspicuous  
336 species. Most glow-worm species have flightless females, while the males of most of these species do  
337 not produce light to attract mates. Combined with the nocturnal activity period, diminutive body size,  
338 and inconspicuous female light signals of most of these species, it is perhaps not surprising that they are  
339 often overlooked. This underscores the need for specialized survey protocols and additional research  
340 into firefly species that do not use flash signals in courtship, particularly basic life history studies that  
341 examine habitat associations and microhabitat needs, larval and adult diets, activity periods, and  
342 threats. Details about priority data deficient species can be found in S2 Supporting Information.

## 343 **Engage and educate**

344 Effective science communication can play an important role in conservation, from garnering  
345 public support and attracting funding to driving policy changes and promoting informed decision  
346 making. For small yet charismatic animals like fireflies, building up communication efforts may lead to  
347 increased support for not only fireflies and their habitats, but invertebrate conservation more broadly.  
348 In tandem with the conservation actions discussed here, we recommend increasing outreach and  
349 education efforts to share new findings and facilitate collaboration. Workshops, social and popular  
350 media, fieldtrips, museum exhibits, community events, and bioblitzes can all be effective means for  
351 increasing engagement with firefly conservation.



## 352 **Conclusions**

353           This paper summarizes the first global IUCN Red List assessments for fireflies. While it does not  
354 include all described species in the U.S. and Canada, it represents a substantial step forward in  
355 understanding extinction risk for North American species. We now have a foundation from which we  
356 can work, which spans the setting of conservation priorities to the establishment of a baseline against  
357 which future findings can be compared. We hope the results and implications discussed in this paper will  
358 catalyze action to study and conserve fireflies, not just in the U.S. and Canada but everywhere fireflies  
359 are found.

## 360 **Acknowledgements**

361           We thank Ron Lyons, Laura Hughes, and Jason Davis for contributing to the Red List  
362 assessments; Annie Nguyen and Aubrey Hornor for assisting with data compilation and georeferencing;  
363 Clay Meredith for co-facilitating the IUCN Red List training workshop; and the dedicated staff at the Red  
364 List Unit, in particular Janet Scott, for publishing the Red List assessments. We are grateful to the many  
365 firefly researchers past and present who have enhanced our understanding of North American fireflies,  
366 the vast network of community scientists who share their observations with the scientific community,  
367 and the many photographers who contributed their photos to the Red List publications and this paper.

## 368 **Author contributions**

369           Conceptualization: CEF AW SL SJ. Investigation: CEF AW SL JC LF CH CXPH BF. Writing – original draft: CEF  
370 AW SL. Writing – review & editing: CEF AW SL JC LF CH CXPH BF SJ.

## 371 References

- 372 1. Rodrigues ASL, Pilgrim JD, Lamoreux JF, Hoffmann M, Brooks TM. The value of the IUCN Red List  
373 for conservation. *Trends Ecol Evol.* 2006;21: 71–76. doi:10.1016/j.tree.2005.10.010
- 374 2. Hoffmann M, Brooks T, da Fonseca G, Gascon C, Hawkins A, James R, et al. Conservation planning  
375 and the IUCN Red List. *Endang Species Res.* 2008;6: 113–125. doi:10.3354/esr00087
- 376 3. IUCN. Table 1a: Number of species evaluated in relation to the overall number of described  
377 species, and numbers of threatened species by major groups of organisms. In: IUCN Red List of  
378 Threatened Species [Internet]. 2021 [cited 4 Mar 2021]. Available:  
379 <https://www.iucnredlist.org/resources/summary-statistics>
- 380 4. Slipinski SA, Leschen R a. B, Lawrence JF. Order Coleoptera Linnaeus, 1758. In : Zhang, Z.-Q. (Ed.)  
381 Animal biodiversity: An outline of higher-level classification and survey of taxonomic richness.  
382 *Zootaxa.* 2011;3148: 203–208. doi:10.11646/zootaxa.3148.1.39
- 383 5. Gerlach J, Samways MJ, Hochkirch A, Seddon M, Cardoso P, Clausnitzer V, et al. Prioritizing non-  
384 marine invertebrate taxa for Red Listing. *J Insect Conserv.* 2014;18: 573–586. doi:10.1007/s10841-  
385 014-9660-6
- 386 6. Branham MA, Wenzel JW. The origin of photic behavior and the evolution of sexual  
387 communication in fireflies (Coleoptera: Lampyridae). *Cladistics.* 2003;19: 1–22. doi:10.1111/j.1096-  
388 0031.2003.tb00404.x
- 389 7. Stanger-Hall KF, Lloyd JE, Hillis DM. Phylogeny of North American fireflies (Coleoptera:  
390 Lampyridae): Implications for the evolution of light signals. *Mol Phylogenet Evol.* 2007;45: 33–49.  
391 doi:10.1016/j.ympev.2007.05.013
- 392 8. Lewis SM, Cratsley CK. Flash signal evolution, mate choice, and predation in fireflies. *Annu Rev*  
393 *Entomol.* 2008;53: 293–321. doi:10.1146/annurev.ento.53.103106.093346
- 394 9. Lloyd JE. Fireflies (Coleoptera: Lampyridae). In: Capinera JL, editor. *Encyclopedia of Entomology.*  
395 Dordrecht: Springer Netherlands; 2008. pp. 1429–1452. doi:10.1007/978-1-4020-6359-6\_3811
- 396 10. Martin GJ, Stanger-Hall KF, Branham MA, Da Silveira LFL, Lower SE, Hall DW, et al. Higher-level  
397 phylogeny and reclassification of Lampyridae (Coleoptera: Elateroidea). *Insect Syst Divers.* 2019;3.  
398 doi:10.1093/isd/ixz024
- 399 11. Brasier AR, Tate JE, Habener JF. Optimized use of the firefly luciferase assay as a reporter gene in  
400 mammalian cell lines. *Biotechniques.* 1989;7: 1116–1122.
- 401 12. Lloyd JE. Firefly parasites and predators. *Coleopt Bull.* 1973;27: 91–106.
- 402 13. Viviani VR, Rocha MY, Hagen O. Bioluminescent beetles (Coleoptera: Elateroidea: Lampyridae,  
403 Phengodidae, Elateridae) in the municipalities of Campinas, Sorocaba-Votorantim and Rio Claro-

- 404 Limeira (SP, Brazil): Biodiversity and influence of urban sprawl. *Biota Neotrop.* 2010;10: 103–116.  
405 doi:10.1590/S1676-06032010000200013
- 406 14. Lewis SM, Faust L, De Cock R. The dark side of the light show: Predators of fireflies in the Great  
407 Smoky Mountains. *Psyche.* 2012; e634027. doi:10.1155/2012/634027
- 408 15. Hagen O, Santos RM, Schlindwein MN, Viviani VR. Artificial night lighting reduces firefly  
409 (Coleoptera: Lampyridae) occurrence in Sorocaba, Brazil. *Adv Entomol.* 2015;3: 24–32.  
410 doi:10.4236/ae.2015.31004
- 411 16. Lewis SM. *Silent sparks: The wondrous world of fireflies.* Princeton, NJ: Princeton University Press;  
412 2016.
- 413 17. Lewis SM, Thancharoen A, Wong CH, López-Palafox T, Santos PV, Wu C, et al. Firefly tourism:  
414 Advancing a global phenomenon toward a brighter future. *Conserv Sci and Prac.* 2021;e391.  
415 doi:10.1111/csp2.391
- 416 18. Fu X, Benno Meyer-Rochow V. Larvae of the firefly *Pyrocoelia pectoralis* (Coleoptera: Lampyridae)  
417 as possible biological agents to control the land snail *Bradybaena ravida*. *Biol Control.* 2013;65:  
418 176–183. doi:10.1016/j.biocontrol.2013.02.005
- 419 19. Atkins V, Bell D. The status of the glow-worm *Lampyrus noctiluca* L. (Coleoptera: Lampyridae) in  
420 England. *Lampyrid.* 2016;4: 20–35.
- 421 20. Gardiner T, Didham RK. Glowing, glowing, gone? Monitoring long-term trends in glow-worm  
422 numbers in south-east England. *Insect Conserv Divers.* 2020;13: 162–174. doi:10.1111/icad.12407
- 423 21. Khoo V, Nada B, Kirton LG, Chooi-Khim P. Monitoring the population of the firefly *Pteroptyx tener*  
424 along the Selangor River, Malaysia for conservation and sustainable ecotourism. *Lampyrid.* 2009;2:  
425 162–173.
- 426 22. Wong C, Yeap CA. Conservation of congregating firefly zones (CFZs) in peninsular Malaysia.  
427 *Lampyrid.* 2012;2: 174–187.
- 428 23. Lewis SM, Wong CH, Owens ACS, Fallon C, Jepsen S, Thancharoen A, et al. A global perspective on  
429 firefly extinction threats. *BioScience.* 2020;70: 157–167. doi:10.1093/biosci/biz157
- 430 24. Cardoso P, Leather SR. Predicting a global insect apocalypse. *Insect Conserv Divers.* 2019;12: 263–  
431 267. doi:10.1111/icad.12367
- 432 25. Montgomery GA, Dunn RR, Fox R, Jongejans E, Leather SR, Saunders ME, et al. Is the insect  
433 apocalypse upon us? How to find out. *Biol Conserv.* 2020;241: 108327.  
434 doi:10.1016/j.biocon.2019.108327
- 435 26. Wagner DL, Grames EM, Forister ML, Berenbaum MR, Stopak D. Insect decline in the  
436 Anthropocene: Death by a thousand cuts. *Proc Natl Acad Sci USA.* 2021;118: e2023989118.  
437 doi:10.1073/pnas.2023989118

- 438 27. Branham M. Lampyridae. In: Leschen R a. B, Beutel RG, Lawrence JF, editors. Coleoptera, Beetles  
439 Morphology and Systematics (Elateroidea, Bostrichiformia, Cucujiformia partim). Berlin, Germany:  
440 Walter de Gruyter; 2010. pp. 141–149. Available: <https://doi.org/10.1515/9783110911213>
- 441 28. Faust L. Fireflies, glow-worms, and lightning bugs: Identification and natural history of the fireflies  
442 of the eastern and central United States and Canada. Athens, GA: University of Georgia Press;  
443 2017.
- 444 29. Buschman LL. Larval biology and ecology of *Photuris fireflies* (Lampyridae: Coleoptera) in  
445 northcentral Florida. J Kans Entomol Soc. 1984;57: 7–16.
- 446 30. Lloyd JE. A naturalist’s long walk among shadows of North American *Photuris*: Patterns, outlines,  
447 silhouettes... echoes. Bridgen Press; 2018.
- 448 31. Lloyd JE. On research and entomological education II: A conditional mating strategy and resource-  
449 sustained lek(?) in a classroom firefly (Coleoptera: Lampyridae; *Photinus*). Fla Entomol. 1998;81:  
450 261–272. doi:10.2307/3495917
- 451 32. Rooney JA, Lewis SM. Notes on the life history and mating behavior of *Ellychnia corrusca*  
452 (Coleoptera: Lampyridae). Fla Entomol. 2000; 324–324.
- 453 33. Faust L, Faust H. The occurrence and behaviors of North American fireflies (Coleoptera:  
454 Lampyridae) on milkweed, *Asclepias syriaca* L. Coleopt Bull. 2014;68: 283–291. doi:10.1649/0010-  
455 065X-68.2.283
- 456 34. Zaragoza-Caballero S. Lampyridae (Coleoptera). In: García-Aldrete AN, Ayala R, editors. Artrópodos  
457 de Chamela. Instituto de Biología, Universidad Nacional Autónoma de México, D.F.; 2004. pp. 139–  
458 150.
- 459 35. Lloyd JE. Aggressive mimicry in *Photuris*: Firefly femmes fatales. Science. 1965;149: 653–654.  
460 doi:10.1126/science.149.3684.653
- 461 36. Lloyd JE. Occurrence of aggressive mimicry in fireflies. Fla Entomol. 1984;67: 368–376.  
462 doi:10.2307/3494715
- 463 37. Faust LF, Forrest TG. Bringing light to the lives of the shadow ghosts, *Phausis inaccensa*  
464 (Coleoptera: Lampyridae). Am Entomol. 2017;63: 177–189. doi:10.1093/ae/tmx027
- 465 38. Lloyd JE. Chemical communication in fireflies. Environ Entomol. 1972;1: 265–266.
- 466 39. Lloyd JE. On research and entomological education VI: Firefly species and lists, old and now. Fla  
467 Entomol. 2003; 99–113.
- 468 40. Cicero J. Two new genera and one new species of firefly (Coleoptera: Lampyridae: Lampyrinae:  
469 Lampyrini), with notes on their biology. Pan-Pac Entomol. 2006;82: 200–207.
- 470 41. Heckscher CM. *Photuris mysticalampas* (Coleoptera: Lampyridae): A new firefly from peatland  
471 floodplain forests of the Delmarva Peninsula. Entomol News. 2013;123: 93–100.  
472 doi:10.3157/021.123.0202

- 473 42. Faust LF, Davis J. A new species of *Photuris* Dejean (Coleoptera: Lampyridae) from a Mississippi  
474 cypress swamp, with notes on its behavior. *Coleopt Bull.* 2019;73: 97–113. doi:10.1649/0010-  
475 065X-73.1.97
- 476 43. Lloyd JE. 62. Lampyridae Latreille 1817. In: Arnett J Ross H, Thomas MC, Skelley PE, Frank JH,  
477 editors. *American Beetles, Volume II Polyphaga: Scarabaeoidea through Curculionoidea*. Boca  
478 Raton, FL: CRC Press; 2002. pp. 187–196.
- 479 44. ITIS. Integrated Taxonomic Information System (ITIS). 2020 [cited 13 Jan 2020]. Available:  
480 <https://itis.gov/>
- 481 45. Cicero J. World Lampyridae, Lycidae, Phengodidae, Drilidae and miscellany. 2013 [cited 29 Mar  
482 2021]. Available: <http://mycantharoidea.arizona.edu/>
- 483 46. IUCN. IUCN Red List categories and criteria, version 3.1, second edition. In: IUCN [Internet]. 2012  
484 [cited 29 Mar 2021]. Available: [https://www.iucn.org/content/iucn-red-list-categories-and-criteria-](https://www.iucn.org/content/iucn-red-list-categories-and-criteria-version-31-second-edition)  
485 [version-31-second-edition](https://www.iucn.org/content/iucn-red-list-categories-and-criteria-version-31-second-edition)
- 486 47. IUCN Standards and Petitions Committee. Guidelines for using the IUCN Red List Categories and  
487 Criteria. Version 14. Prepared by the Standards and Petitions Committee. 2019. Available:  
488 <http://www.iucnredlist.org/documents/RedListGuidelines.pdf>
- 489 48. IUCN. The IUCN Red List of Threatened Species. In: IUCN Red List of Threatened Species [Internet].  
490 2021 [cited 29 Mar 2021]. Available: <https://www.iucnredlist.org/en>
- 491 49. Environmental Protection Agency. Ecoregions of North America. 2018 [cited 27 May 2021].  
492 Available: <https://data.nal.usda.gov/dataset/ecoregions-north-america>
- 493 50. Hoffmann M, Hilton-Taylor C, Angulo A, Böhm M, Brooks TM, Butchart SHM, et al. The impact of  
494 conservation on the status of the world’s vertebrates. *Science*. 2010;330: 1503–1509.  
495 doi:10.1126/science.1194442
- 496 51. Richman NI, Böhm M, Adams SB, Alvarez F, Bergey EA, Bunn JJS, et al. Multiple drivers of decline in  
497 the global status of freshwater crayfish (Decapoda: Astacidea). *Phil Trans R Soc B*. 2015;370:  
498 20140060. doi:10.1098/rstb.2014.0060
- 499 52. Payne JL, Finnegan S. The effect of geographic range on extinction risk during background and  
500 mass extinction. *PNAS*. 2007;104: 10506–10511. doi:10.1073/pnas.0701257104
- 501 53. Chichorro F, Juslén A, Cardoso P. A review of the relation between species traits and extinction  
502 risk. *Biol Conserv*. 2019;237: 220–229. doi:10.1016/j.biocon.2019.07.001
- 503 54. Nolte D, Boutaud E, Kotze DJ, Schuldt A, Assmann T. Habitat specialization, distribution range size  
504 and body size drive extinction risk in carabid beetles. *Biodivers Conserv*. 2019;28: 1267–1283.  
505 doi:10.1007/s10531-019-01724-9
- 506 55. Reed JM, Nguyen A, Owens ACS, Lewis SM. Linking the seven forms of rarity to extinction threats  
507 and risk factors: an assessment of North American fireflies. *Biodivers Conserv*. 2020;29: 57–75.  
508 doi:10.1007/s10531-019-01869-7

- 509 56. Lloyd JE. Observations on the biology of three luminescent beetles (Coleoptera: Lampyridae,  
510 Elateridae). *Ann Entomol Soc Am.* 1965;58: 588–591. doi:10.1093/aesa/58.4.588
- 511 57. Williams AP, Cook ER, Smerdon JE, Cook BI, Abatzoglou JT, Bolles K, et al. Large contribution from  
512 anthropogenic warming to an emerging North American megadrought. *Science.* 2020;368: 314–  
513 318. doi:10.1126/science.aaz9600
- 514 58. Konikow LF. Groundwater depletion in the United States (1900–2008): USGS Scientific  
515 Investigations Report 2013–5079. 2013 p. 63. Available: <https://pubs.usgs.gov/sir/2013/5079/>
- 516 59. Wu W-Y, Lo M-H, Wada Y, Famiglietti JS, Reager JT, Yeh PJ-F, et al. Divergent effects of climate  
517 change on future groundwater availability in key mid-latitude aquifers. *Nat Commun.* 2020;11:  
518 3710. doi:10.1038/s41467-020-17581-y
- 519 60. Zektser S, Loáiciga HA, Wolf JT. Environmental impacts of groundwater overdraft: selected case  
520 studies in the southwestern United States. *Env Geol.* 2005;47: 396–404. doi:10.1007/s00254-004-  
521 1164-3
- 522 61. Buschman L. Field guide to western North American fireflies. 2016 p. 33. Available:  
523 <http://entomology.k-state.edu/doc/WesternFireflies%20March%202016a.pdf>
- 524 62. Dahl TE. Wetlands losses in the United States, 1780's to 1980's. Report to the Congress. National  
525 Wetlands Inventory, St. Petersburg, FL (USA); 1990 Jan. Report No.: PB-91-169284/XAB. Available:  
526 <https://www.osti.gov/biblio/5527872-wetlands-losses-united-states-report-congress>
- 527 63. Dahl TE. Status and trends of wetlands in the conterminous United States 2004 to 2009. U.S.  
528 Department of the Interior, U.S. Fish and Wildlife Service, Fisheries and Habitat Conservation;  
529 2011.
- 530 64. Sucik MT, Marks E. The status and recent trends of wetlands in the United States. Ames, IA: USDA  
531 Natural Resources Conservation Service; 2014 p. 25.
- 532 65. Vaz S, Guerrazzi MC, Rocha M, Faust L, Khattar G, Mermudes J, et al. On the intertidal firefly genus  
533 *Micronaspis* Green, 1948, with a new species and a phylogeny of Cratomorphini based on adult  
534 and larval traits (Coleoptera: Lampyridae). *Zool Anz.* 2021;292: 64–91.  
535 doi:10.1016/j.jcz.2021.01.002
- 536 66. Owens ACS, Cochard P, Durrant J, Farnworth B, Perkin EK, Seymoure B. Light pollution is a driver of  
537 insect declines. *Biol Conserv.* 2020;241: 108259. doi:10.1016/j.biocon.2019.108259
- 538 67. Owens ACS, Lewis SM. The impact of artificial light at night on nocturnal insects: A review and  
539 synthesis. *Ecol Evol.* 2018;8: 11337–11358. doi:10.1002/ece3.4557
- 540 68. Owens ACS, Lewis SM. Narrow-spectrum artificial light silences female fireflies (Coleoptera:  
541 Lampyridae). *Insect Conserv Divers.* 2021;14: 199–210. doi:10.1111/icad.12487
- 542 69. Owens ACS, Lewis SM. Effects of artificial light on growth, development, and dispersal of two  
543 North American fireflies (Coleoptera: Lampyridae). *J Insect Physiol.* 2021;130: 104200.  
544 doi:10.1016/j.jinsphys.2021.104200

- 545 70. USFWS. Environmental Conservation Online System (ECOS). Online database. In: Environmental  
546 Conservation Online System (ECOS) [Internet]. 2021 [cited 29 Mar 2021]. Available:  
547 <https://ecos.fws.gov/ecp0/reports/ad-hoc-species-report-input>
- 548 71. Sullivan BL, Wood CL, Iloff MJ, Bonney RE, Fink D, Kelling S. eBird: A citizen-based bird observation  
549 network in the biological sciences. *Biol Conserv.* 2009;142: 2282–2292.  
550 doi:10.1016/j.biocon.2009.05.006
- 551 72. Harvey JA, Heinen R, Armbrecht I, Basset Y, Baxter-Gilbert JH, Bezemer TM, et al. International  
552 scientists formulate a roadmap for insect conservation and recovery. *Nat Ecol Evol.* 2020;4: 174–  
553 176. doi:10.1038/s41559-019-1079-8
- 554 73. Kawahara AY, Reeves LE, Barber JR, Black SH. Opinion: Eight simple actions that individuals can  
555 take to save insects from global declines. *Proc Natl Acad Sci USA.* 2021;118: e2002547117.  
556 doi:10.1073/pnas.2002547117
- 557 74. Firefly Watch Community Science Project. In: Mass Audubon [Internet]. [cited 25 May 2021].  
558 Available: <https://www.massaudubon.org/get-involved/community-science/firefly-watch>
- 559 75. Western Firefly Project: A Community Science Initiative. In: Natural History Museum of Utah  
560 [Internet]. 25 Jul 2017 [cited 25 May 2021]. Available: [https://nhmu.utah.edu/citizen-](https://nhmu.utah.edu/citizen-science/fireflies)  
561 [science/fireflies](https://nhmu.utah.edu/citizen-science/fireflies)
- 562 76. iNaturalist. In: iNaturalist [Internet]. [cited 25 May 2021]. Available: <https://www.inaturalist.org/>  
563

## 564 **Supporting information**

565 **S1 Table. Firefly species distributions in the U.S. and Canada.** Species name: †: Awaiting publication on  
566 the IUCN Red List. RL category: DD\*: Potentially threatened DD species. Occurrence and Distribution:  
567 Extant (E): Species has been reported since 2000; Presence uncertain (U): Species reported prior to  
568 2000; Possibly Extant (PE): No known records but habitat or locality is appropriate and species may  
569 occur here; Possibly Extinct (PX): Species has not been seen in many years despite comprehensive  
570 survey efforts.

571 **S2 Table. Firefly taxonomic experts consulted in this project.** Contributor: Contributed information to  
572 Red List assessments; Assessor: Co-authored Red List assessments; Reviewer: Reviewed Red List  
573 assessments; Determiner: Verified species IDs.

574

575 **S3 Table. Recommended conservation actions for threatened firefly species in the U.S. and Canada.**

576

577 **S4 Table. North American firefly genera with total number of species assessed, percentage of**  
578 **threatened and data deficient species, and behavioral type.**

579 **S5 Table. Potentially threatened DD firefly species.**



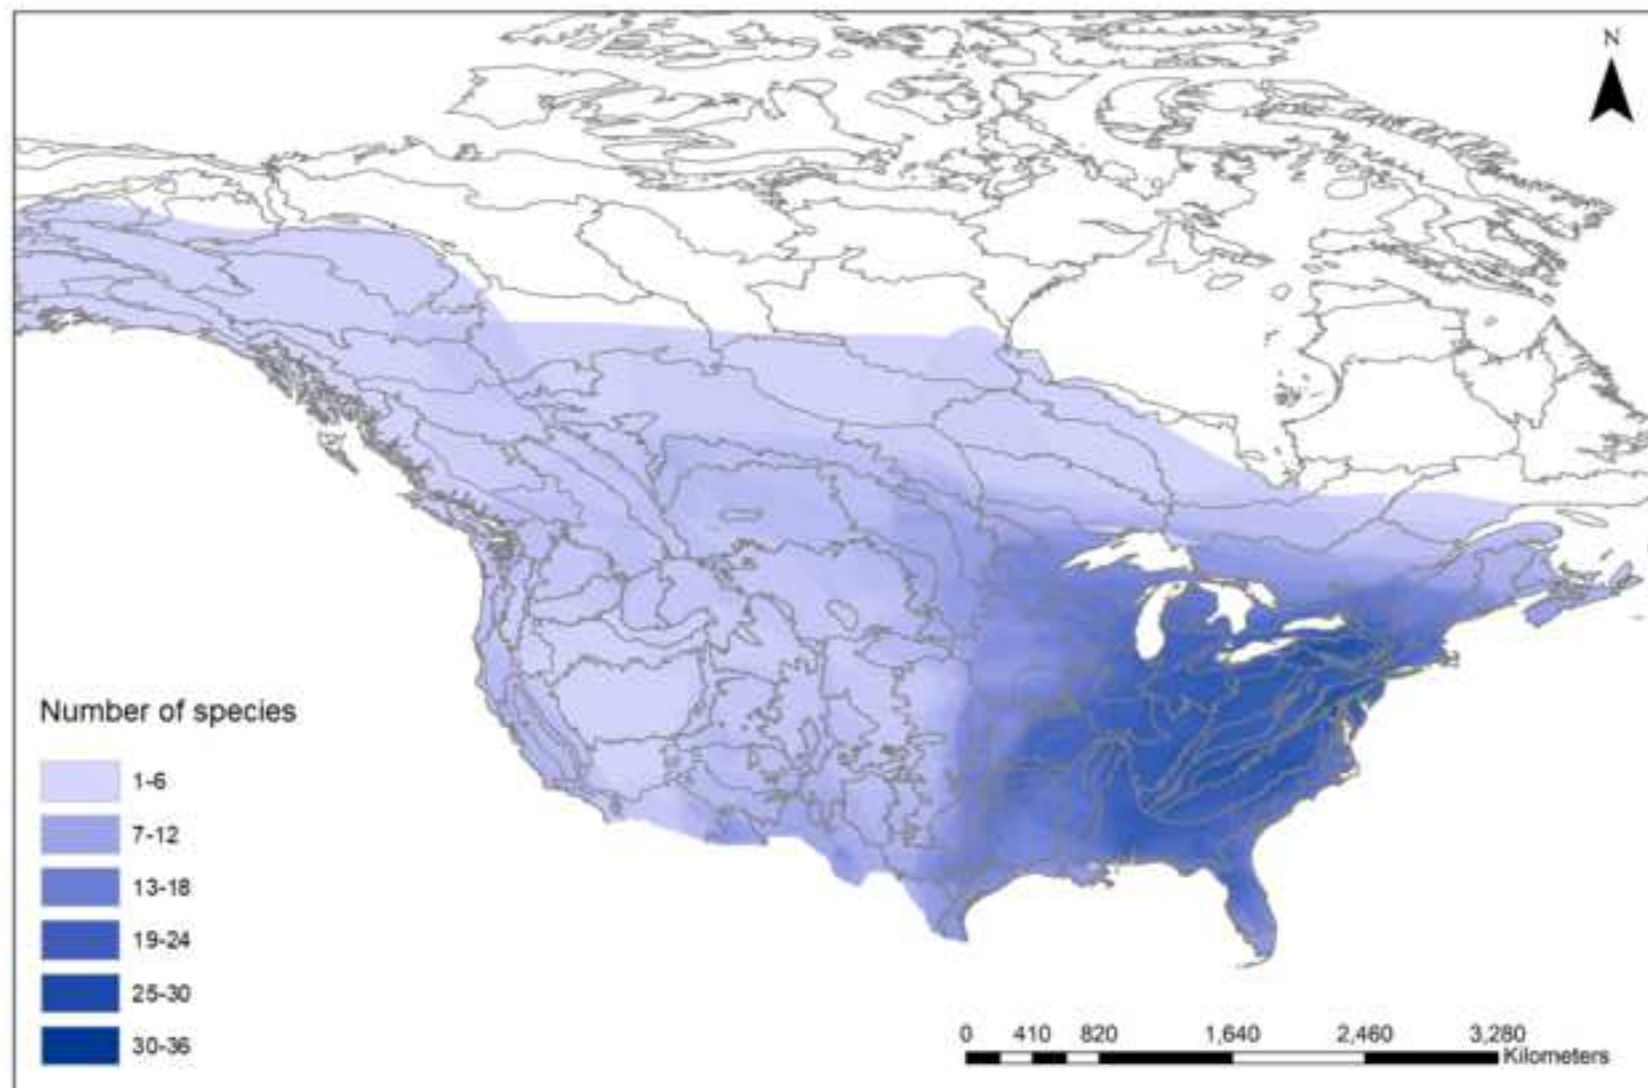

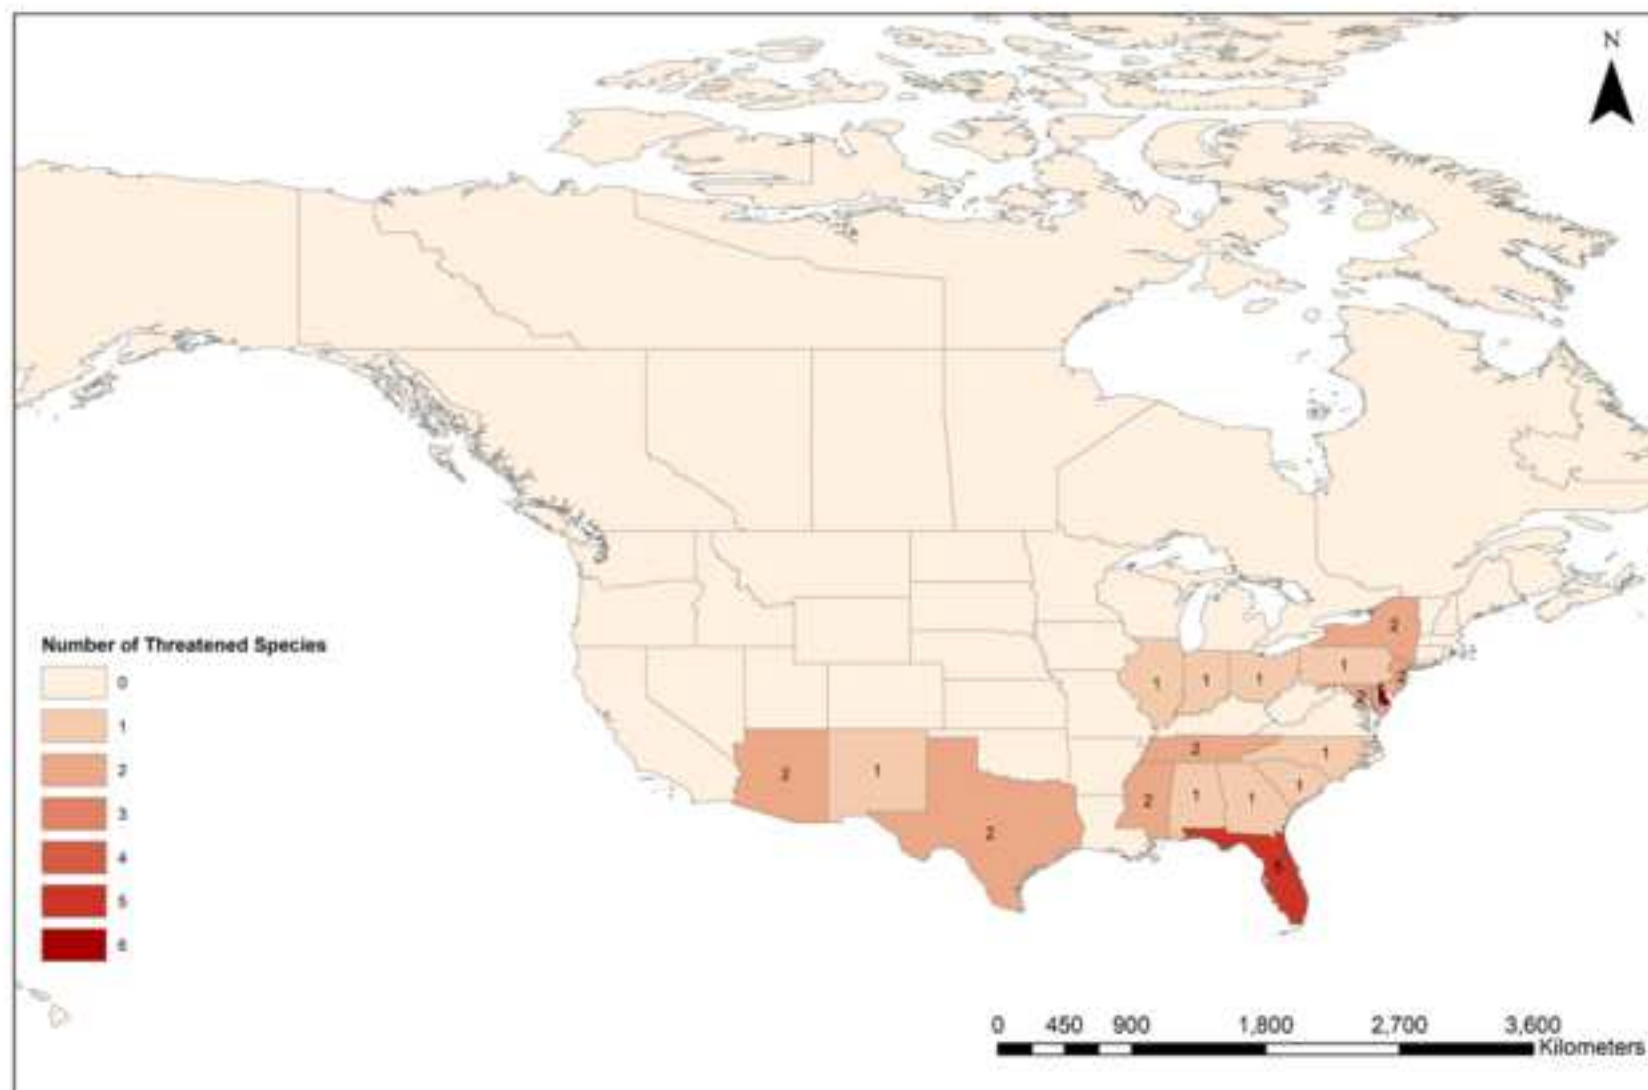

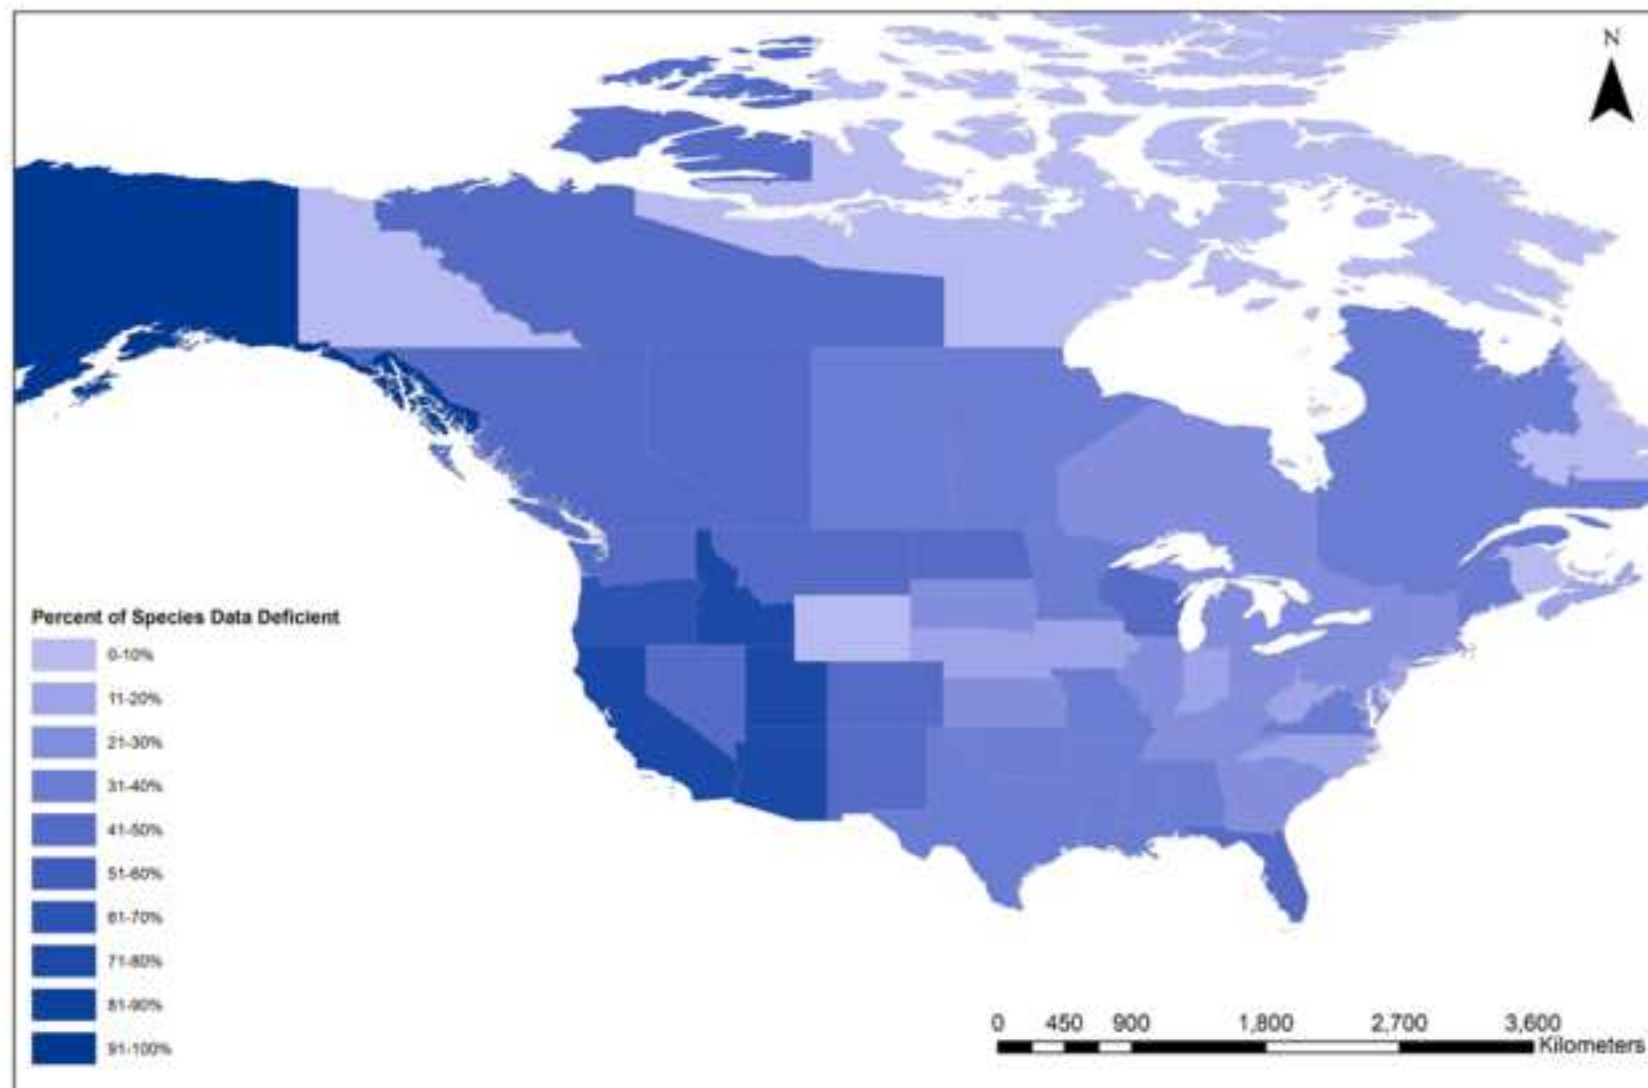

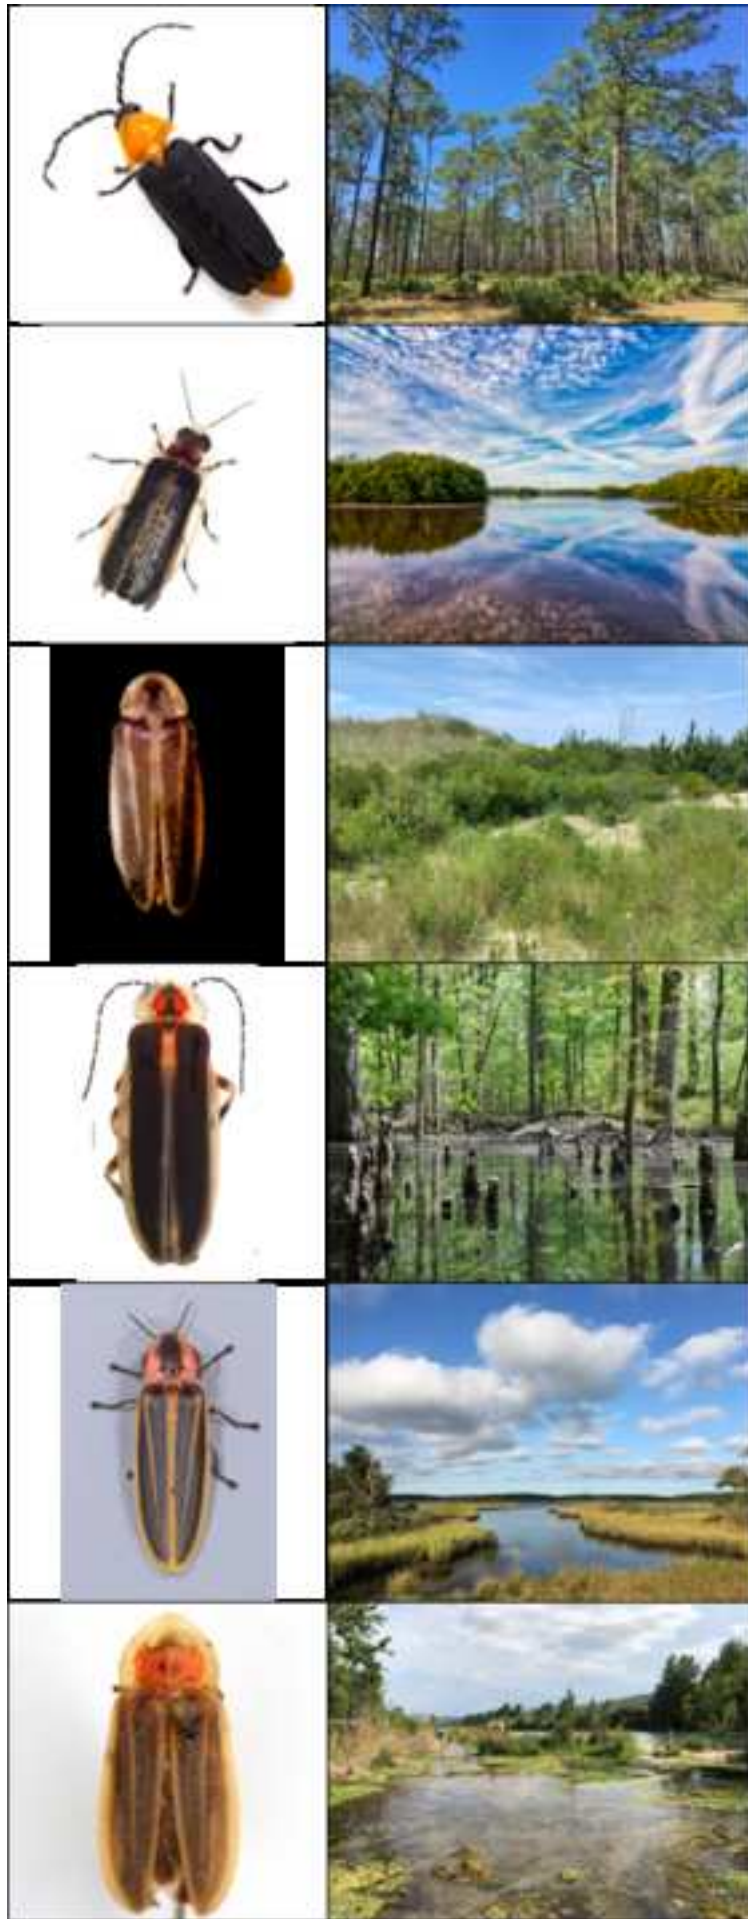

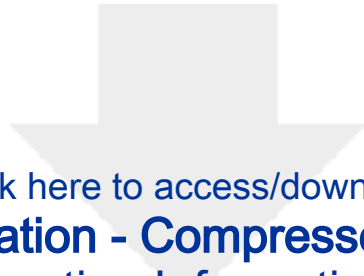

[Click here to access/download](#)

**Supporting Information - Compressed/ZIP File Archive**  
Supporting Information.zip

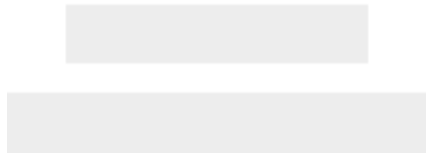

Supplement: pone.0259379.s007.pdf [file pone.0259379.s007.pdf]
